# Supplementary material for: Practical Calling Approach for Exome Array-Based Genome-Wide Association Studies in Korean Population
Source: Hindawi journal article supplement (doi:10.1155/2015/421715), 2015-01-01
Supplement: f1 [file 421715.f1.pdf]

# Distribution of variants in exonic region

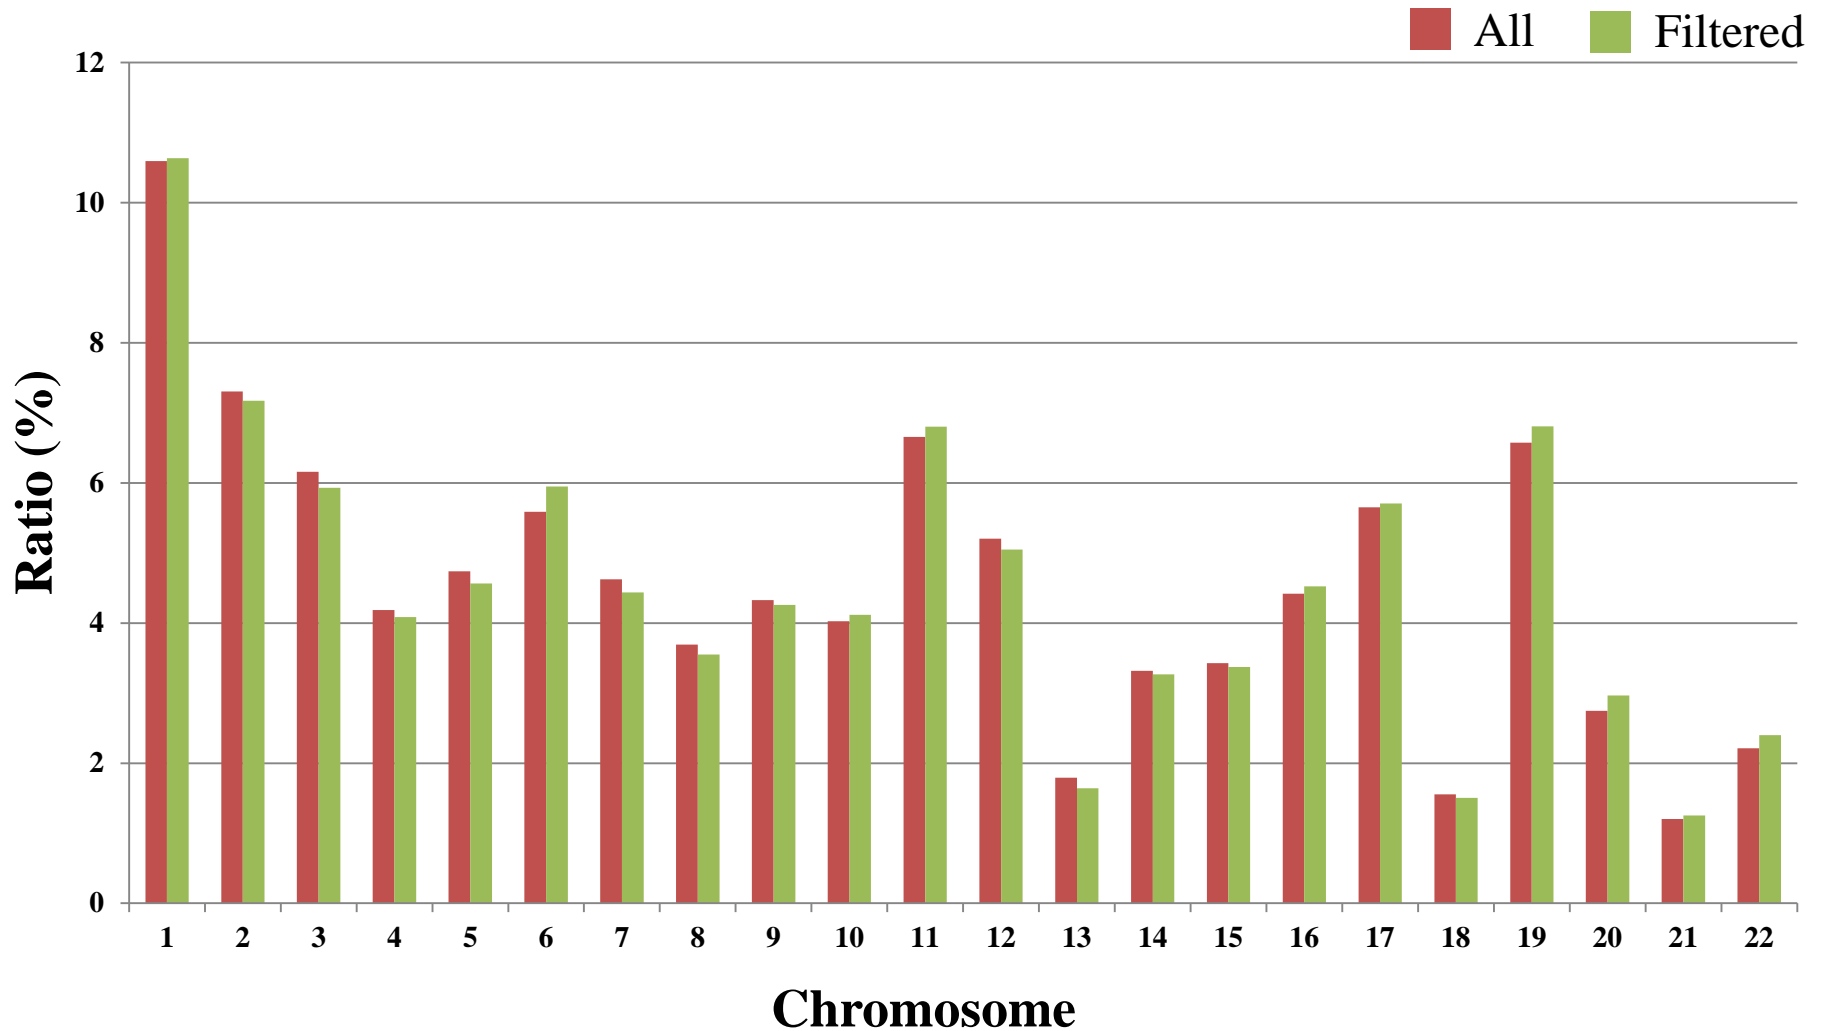

(a)

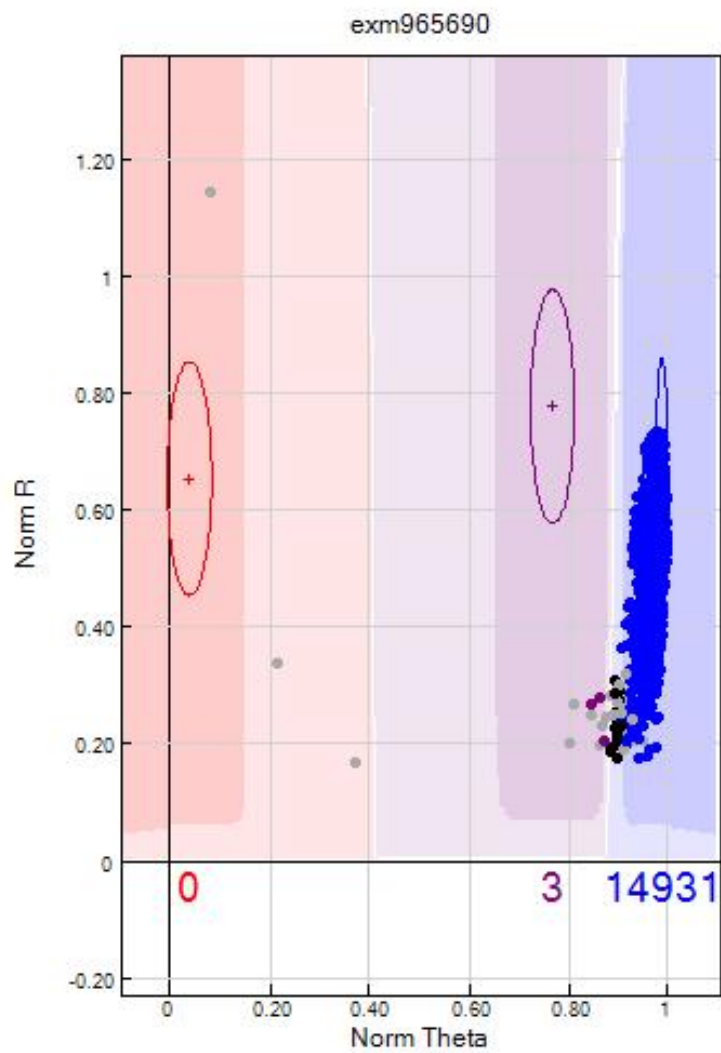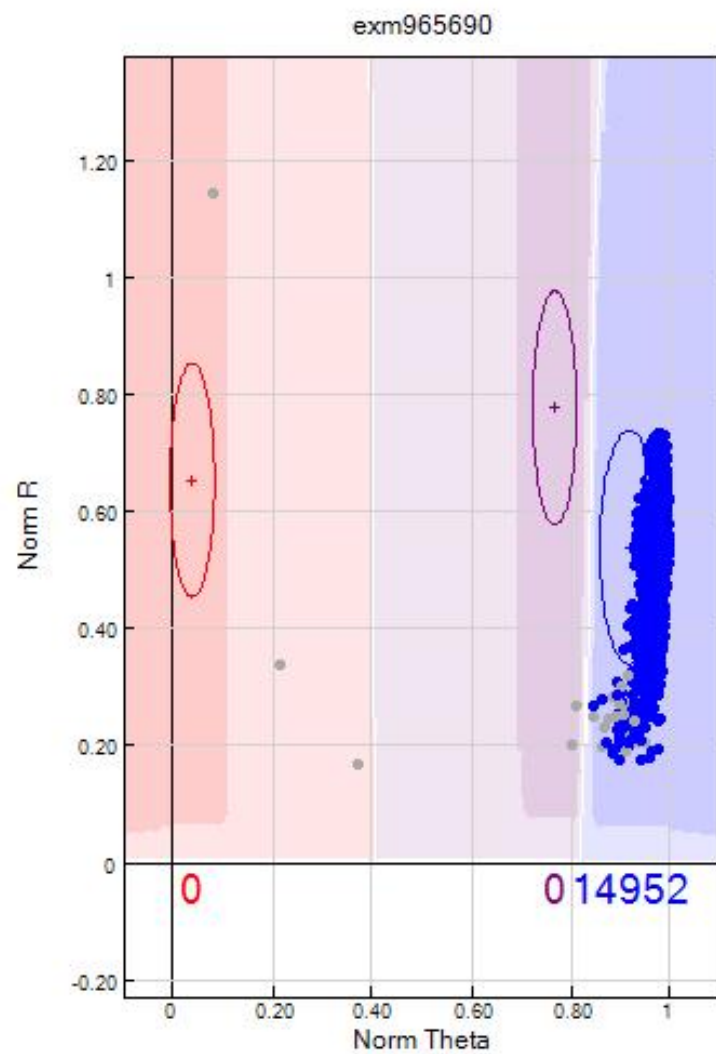

(b)

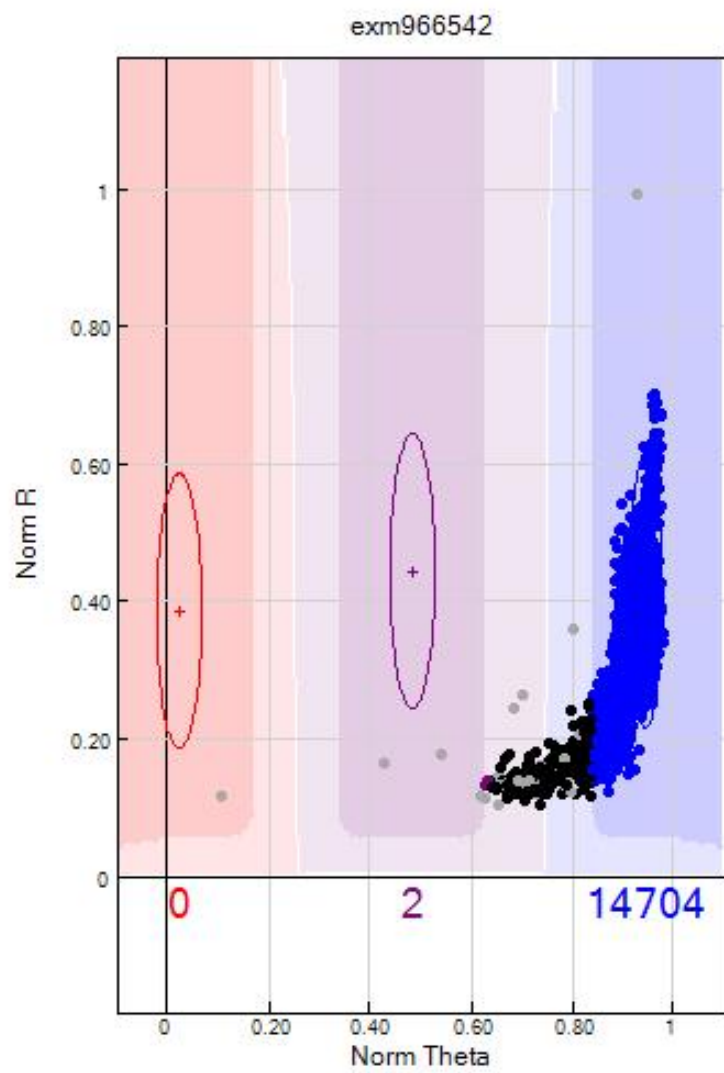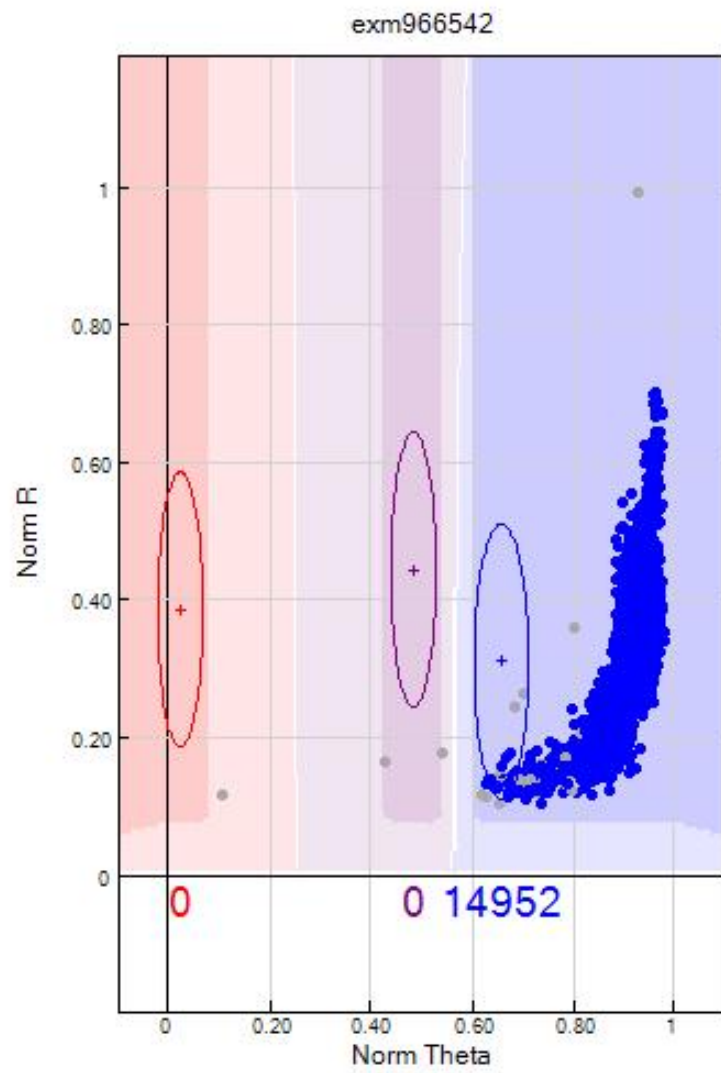

(c)

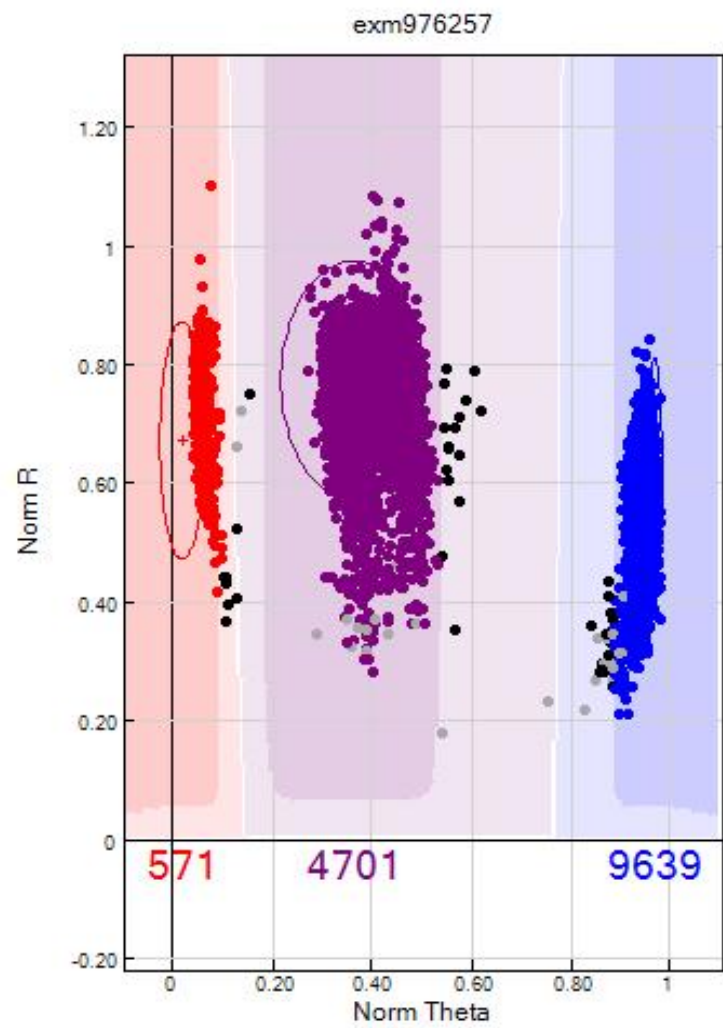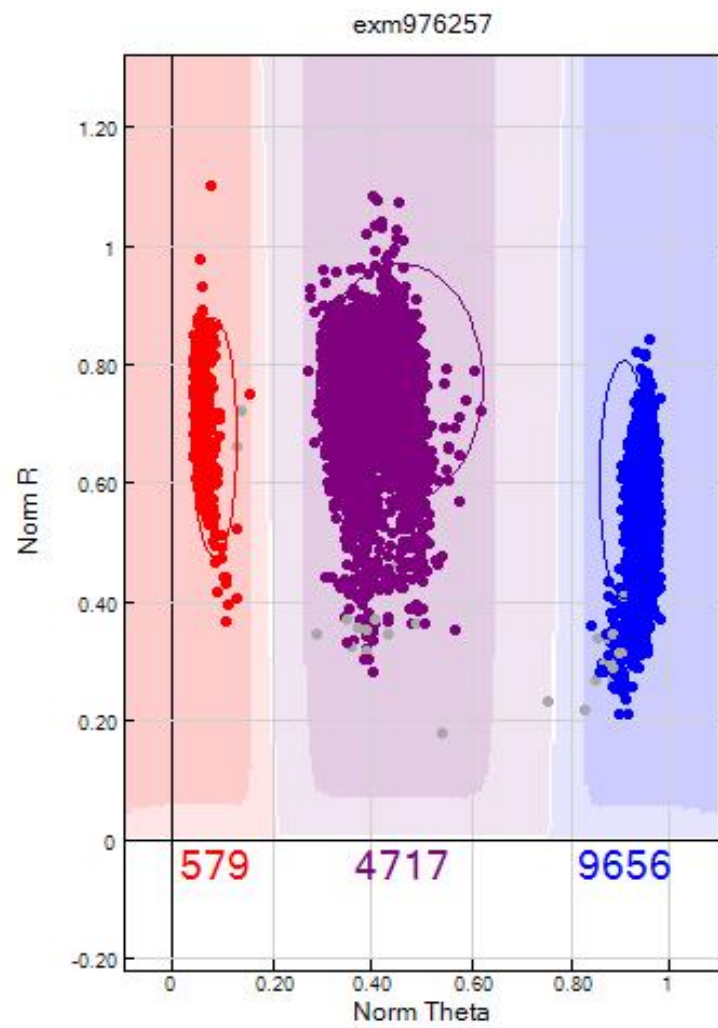

## Supplementary figure legends

**Supplementary Figure 1.** Distribution of variants in exonic regions using our guidelines.

The  $x$  and  $y$  axes indicate the chromosome number and ratio of exonic variants, respectively. The red and blue bars represent the ratio of exonic variants whether using baseline/unfiltered data or our guidelines, respectively.

**Supplementary Figure 2.** Examples of comparison between before and after manual clustering.

The figures show the three typical clusters seen prior to manual re-clustering that the user controlled directly. Figures on the left show the original cluster patterns, whereas those on the right show the modified cluster patterns. Also, clusters were composed of three different genotypes such as AA (red area on the left), AB (purple area in the middle) and BB (blue area on the right).

**Supplementary Table 1.** Non-reference concordance and accuracy of hetero allele between before and after of manual re-clustering by minor allele count (MAC)

| MAC | Non-reference concordance <sup>*</sup> |               | Accuracy of hetero allele <sup>*</sup> |               |
|-----|----------------------------------------|---------------|----------------------------------------|---------------|
|     | Before                                 | After         | Before                                 | After         |
| 2   | 0.9940 ± 0.07                          | 0.9985 ± 0.04 | 0.8904 ± 0.30                          | 0.9599 ± 0.14 |
| 3   | 0.9918 ± 0.09                          | 0.9989 ± 0.02 | 0.9159 ± 0.27                          | 0.9523 ± 0.14 |
| 4   | 1.0000 ± 0.00                          | 0.9975 ± 0.04 | 0.9483 ± 0.21                          | 0.9603 ± 0.11 |
| 5   | 0.9993 ± 0.01                          | 0.9989 ± 0.02 | 0.9115 ± 0.27                          | 0.9584 ± 0.11 |

<sup>\*</sup>Non-reference concordance and accuracy of hetero allele were designated as mean ± standard deviation (SD).

**Supplementary Table 2.** The number of variants in each functional category before and after guideline implementation

| Functional category | Exome chip contents | Before our guideline | After our guideline |
|---------------------|---------------------|----------------------|---------------------|
| exonic              | 219,765             | 62,655               | 61,813              |
| intergenic          | 13,197              | 7,952                | 7,923               |
| intronic            | 5,617               | 5,332                | 5,314               |
| splicing            | 1,964               | 314                  | 304                 |
| ncRNA_intronic      | 782                 | 744                  | 738                 |
| 3' UTR              | 556                 | 453                  | 450                 |
| 5' UTR              | 237                 | 155                  | 154                 |
| downstream          | 184                 | 174                  | 172                 |
| ncRNA_exonic        | 176                 | 118                  | 119                 |
| upstream            | 172                 | 157                  | 157                 |
| exonic;splicing     | 72                  | 19                   | 19                  |
| upstream;downstream | 22                  | 22                   | 22                  |
| ncRNA_UTR3          | 16                  | 14                   | 14                  |
| ncRNA_UTR5          | 5                   | 4                    | 4                   |
| ncRNA_splicing      | 1                   | 1                    | 1                   |
| Total               | 242,766             | 78,114               | 77,204              |

UTR, untranslated region; ncRNA, non-coding RNA.
